# Supplementary material for: Diagnostic Value of Plasma Annexin A2 in Early-Stage High-Grade Serous Ovarian Cancer
Source: Diagnostics (Basel). 2021 Jan 4;11(1):69. doi: 10.3390/diagnostics11010069 (PMC7823988; doi:10.3390/diagnostics11010069)
Supplement: Supplementary file 1 [file diagnostics-11-00069-s001.pdf]

# Supplementary materials

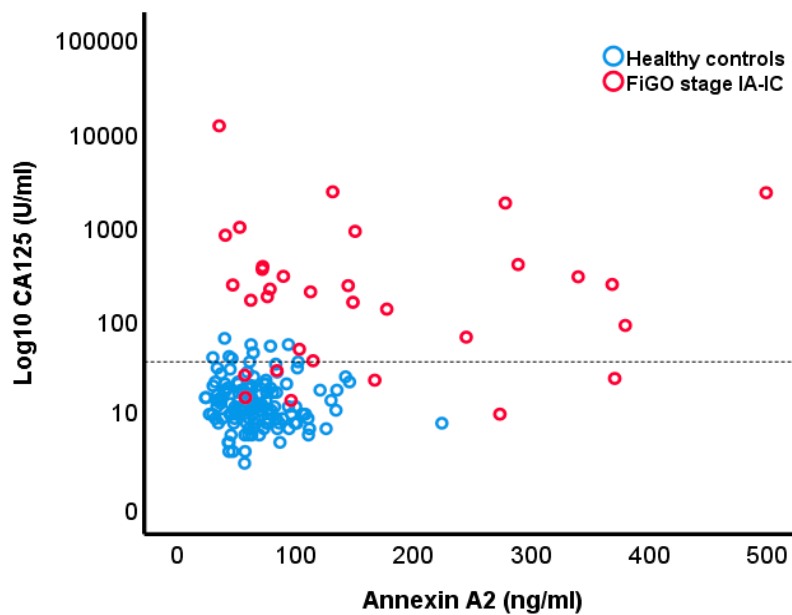

**Supplementary Figure S1.** Scatterplot for the correlation of plasma annexin A2 (ng/ml) and CA125 levels (U/ml) in OC (FIGO stage IA-IC, n=32, red) and healthy controls (n=143, blue). Dotted line represents CA125 cut-off value = 35U/ml. Stage I OC (n=7, red) with normal CA125 values (<35U/ml). Spearman's rho correlation (Correlation coefficient = 0.154, P=0.042).

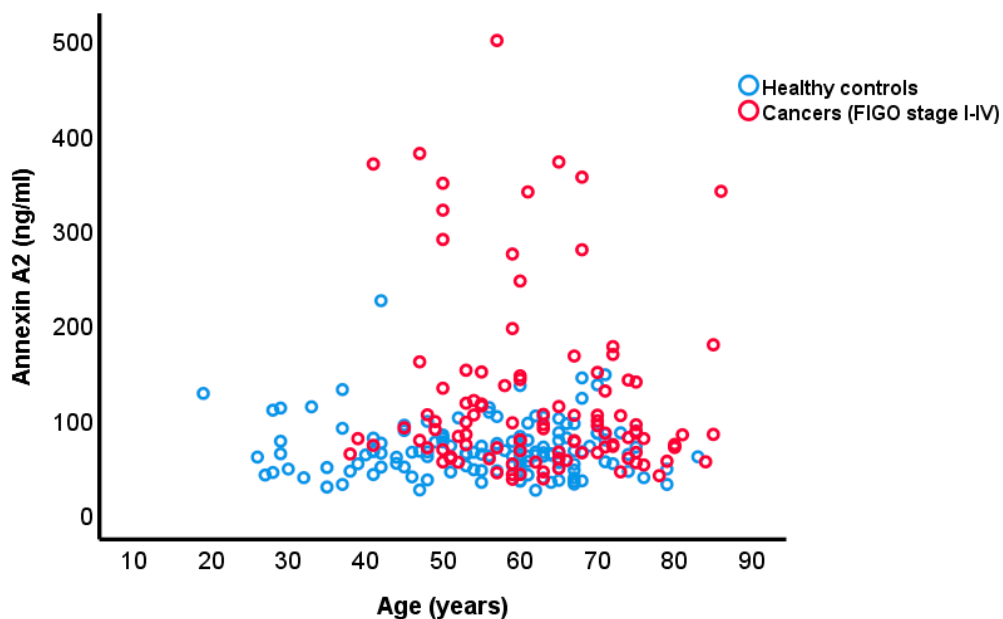

**Supplementary Figure S2.** Scatterplot for the correlation of plasma annexin A2 levels (ng/ml) and age (years) in OC (FIGO stage I-IV, n=105, red) and healthy controls (n=143, blue). Spearman's rho correlation (Correlation coefficient = 0.040, P=0.531).

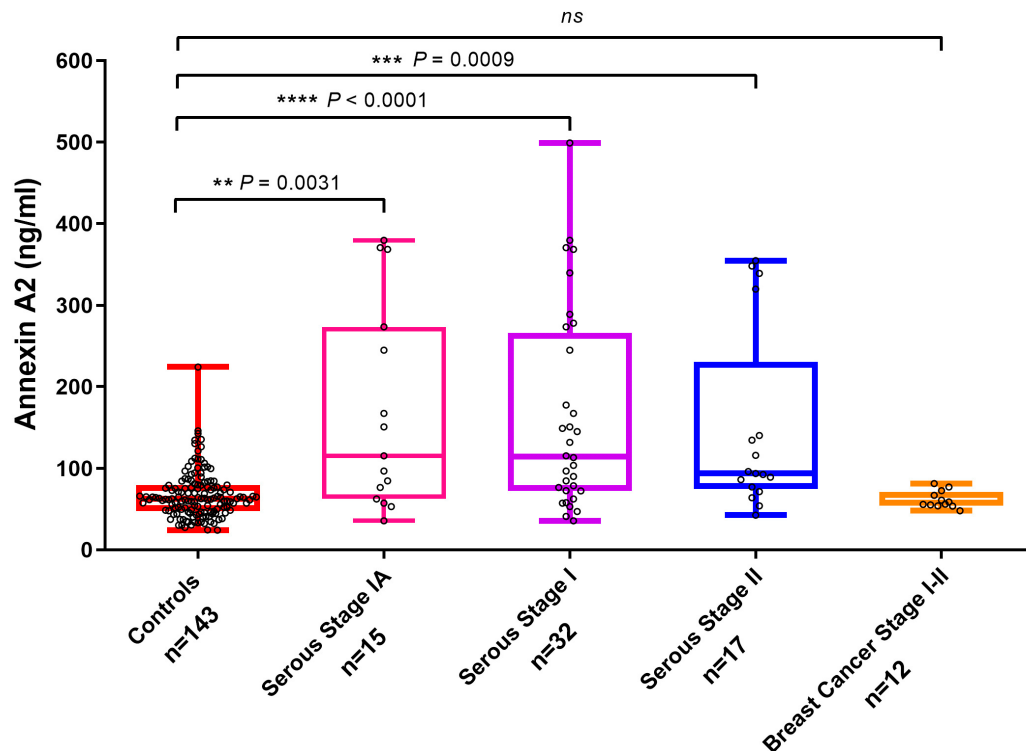

**Supplementary Figure S3.** Plasma annexin A2 levels in patients with breast cancer, serous ovarian cancer and healthy controls. Box and whisker plots representing plasma annexin A2 levels measured in stage IA (n=15), stage IA-IC (n=32) and stage II (n=17) OC, stage I-II (n=12) breast cancers and healthy controls (n=143). The median values for plasma annexin A2: Stage IA (115.3 ng/ml, range: 35.7 – 379.7), stage IA-IC (114.2 ng/ml, range: 35.7 – 499.1) and stage II (93.6 ng/ml, range: 42.6 – 354.7) serous ovarian cancers, stage I-II breast cancers (57.6 ng/ml, range: 48.1 – 81.4), and healthy controls (62.6 ng/ml, range: 24.2 – 224.3). The comparison between patient groups was performed by Kruskal-Wallis test and Dunn's multiple comparison test. (ns = not significant)

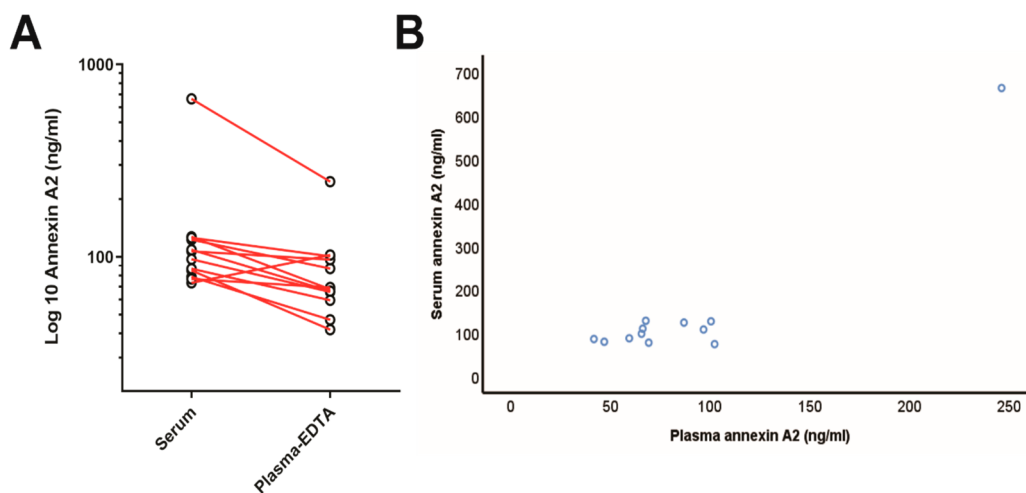

**Supplementary Figure S4.** (a) Serum annexin A2 and plasma annexin A2 levels in matching patient samples (n=12). (b) Scatterplot for the correlation of serum annexin A2 and plasma EDTA annexin A2 levels in matching patient samples (n=12). Spearman's rho correlation (Correlation coefficient = 0.364, P=0.245).

**Supplementary Table S1.** Clinicopathological characteristics of the patient cohort.

| Patient Cohort                                     | Disease Status                     | n   | Age (Years)       | CA125 (U/ml)     |
|----------------------------------------------------|------------------------------------|-----|-------------------|------------------|
|                                                    |                                    |     | Median<br>(range) | Median (range)   |
| High grade<br>serous<br>ovarian cancers<br>(n=105) | FIGO stage IA                      | 15  | 59 (38-75)        | 154 (9-11710)    |
|                                                    | FIGO stage IA-IC                   | 32  | 58 (38-86)        | 206 (9-11710)    |
|                                                    | FIGO stage IIA-IIC                 | 17  | 60 (41-75)        | 298 (22-4710)    |
|                                                    | FIGO stage IIIA-IIIC               | 54  | 67 (39-85)        | 903 (47-11200)   |
|                                                    | FIGO stage IV                      | 2   | 67 (63-70)        | 4760 (2050-7470) |
| Breast cancers<br>(n=12)                           | Stage I                            | 6   | 52 (41-66)        | -                |
|                                                    | Stage II                           | 6   | 61 (46-68)        | -                |
| Benign ovarian<br>lesions<br>(n=55)                | Ovarian serous cystadenoma         | 17  | 55 (28-87)        | 12 (3-320)       |
|                                                    | Ovarian serous cystadenofibroma    | 9   |                   |                  |
|                                                    | Ovarian serous cyst                | 17  |                   |                  |
|                                                    | Ovarian fibroma                    | 6   |                   |                  |
|                                                    | Ovarian endometrioma               | 1   |                   |                  |
|                                                    | Ovarian leiomyoma                  | 1   |                   |                  |
|                                                    | Ovarian mucinous cystadenoma       | 1   |                   |                  |
|                                                    | Ovarian fibrothecoma               | 1   |                   |                  |
|                                                    | Mature cystic teratoma             | 1   |                   |                  |
|                                                    | Ovarian mesothelial inclusion cyst | 1   |                   |                  |
| Healthy controls<br>(n=143)                        | Healthy controls                   | 143 | 60 (19-83)        | 12 (2-63)        |

**Supplementary Table S2.** (a) Patient numbers for each cohort from different centers and (b) median values for patient age and range (years).

| Center                               | A. Total patient numbers |        |          |          |          |         |          |           |          |
|--------------------------------------|--------------------------|--------|----------|----------|----------|---------|----------|-----------|----------|
|                                      | Controls                 | Benign | Stage IA | Stage IB | Stage IC | Stage I | Stage II | Stage III | Stage IV |
| Royal Adelaide Hospital              | 58                       | 18     | 2        | 0        | 2        | 4       | 2        | 8         | 1        |
| Hudson Institute of Medical Research | 10                       | 37     | 9        | 2        | 6        | 17      | 15       | 45        | 1        |
| Precision Med                        | 75                       | 0      | 0        | 0        | 0        | 0       | 0        | 0         | 0        |
| Ontario Tumor Bank                   | 0                        | 0      | 4        | 0        | 7        | 10      | 0        | 1         | 0        |
| Total                                | 143                      | 55     | 15       | 2        | 15       | 31      | 17       | 54        | 2        |

| Center                               | B. Patient Age (years), Median (range) |            |            |            |            |            |            |            |          |
|--------------------------------------|----------------------------------------|------------|------------|------------|------------|------------|------------|------------|----------|
|                                      | Controls                               | Benign     | Stage IA   | Stage IB   | Stage IC   | Stage I    | Stage II   | Stage III  | Stage IV |
| Royal Adelaide Hospital              | 48 (19-79)                             | 58 (28-83) | 49 (38-59) | -          | 58 (50-65) | 55 (38-65) | 62 (60-63) | 63 (50-85) | 70       |
| Hudson Institute of Medical Research | 60 (53-74)                             | 55 (39-87) | 56 (41-72) | 72 (68-76) | 55 (51-86) | 56 (41-86) | 58 (41-75) | 67 (39-84) | 63       |
| Precision Med                        | 63 (30-83)                             | -          | -          | -          | -          | -          | -          | -          | -        |
| Ontario Tumor Bank                   | -                                      | -          | 63 (55-75) | -          | 60 (45-85) | 60 (45-85) | -          | 60         | -        |
